# Supplementary material
Source: PubMed Central journal article supplement (PMC7336363)
Supplement: NIHMS1585454-supplement-Horvat_et_al__Supp_materials.pdf [file NIHMS1585454-supplement-Horvat_et_al__Supp_materials.pdf]

A Gene-Centric Strategy for Identifying Disease-Causing  
Rare Variants in Dilated Cardiomyopathy

SUPPLEMENTAL MATERIAL

CONTENTS

|                               |    |
|-------------------------------|----|
| Supplementary Figure Legends  | 2  |
| Supplementary Figures         | 4  |
| Supplementary Tables          | 8  |
| Supplementary Acknowledgments | 30 |
| Supplementary References      | 32 |

## Supplemental Figure Legends

**Figure S1.** Principal components analysis (PCA) of study participants. A PCA analysis of Boston and Australian DCM cases (n=203, black dots) and healthy control subjects (n=208, black dots) and UK DCM cases (n=329, red crosses) and control subjects (n=319, green circles) was performed using SmartPCA software (ref) and 127 single nucleotide variants that were common to all groups and had a genotyping rate of >88%.

**Figure S2.** Genotype-phenotype correlations for missense variants. All rare variants (MAF < 0.1%) in the 41-gene data-set that were present in the family proband were evaluated in family members. The presence (+) or absence (-) of variants in relatives is shown. DCM status is denoted as affected (solid symbols), unaffected (open symbols), or unknown (gray symbols); probands are indicated by arrows.

**Figure S3.** Pedigrees for 5 kindreds in which multiple (5+) rare variants were identified in the family proband. For this analysis, all variants with a MAF < 1.0% in any of the genes in the 69-gene targeted re-sequencing panel were included. The presence (+) or absence (-) of variants in relatives is shown, with co-segregating variants in bold type. DCM status is denoted as affected (solid symbols), unaffected (open symbols), or unknown (gray symbols); probands are indicated by arrows.

**Figure S4.** Distribution of rare variants in DCM cases and control subjects. Location of rare variants in different protein domains is shown for the group A genes: (A) *DES*, (B) *SCN5A*, (C) *BAG3*, (D) *TPMI*, (E) *TNNT2*, (F) *DSP*, (G) *PLN*, (H) *DMD*, (I) *LDB3*. Variants identified in DCM patients in the discovery cohort (top row) and in the familial DCM (FDCM) replication cohort (second row) are shown: all variants (pink, “DCM all”), damaging variants (red, “DCM

HP”). Variant types are indicated by: circle =missense, square = splice site change, diamond = frameshift, star = stop codon. The third row shows DCM variants identified by two clinical diagnostic laboratories (“DCM Walsh”).<sup>1</sup> Missense variants identified in control subjects are shown below the protein schematic: control subjects in this study (Controls), Exome Aggregation Consortium (ExAC) database. See Supplementary Table S9 for protein domain coordinates and statistical analysis.

Figure S1

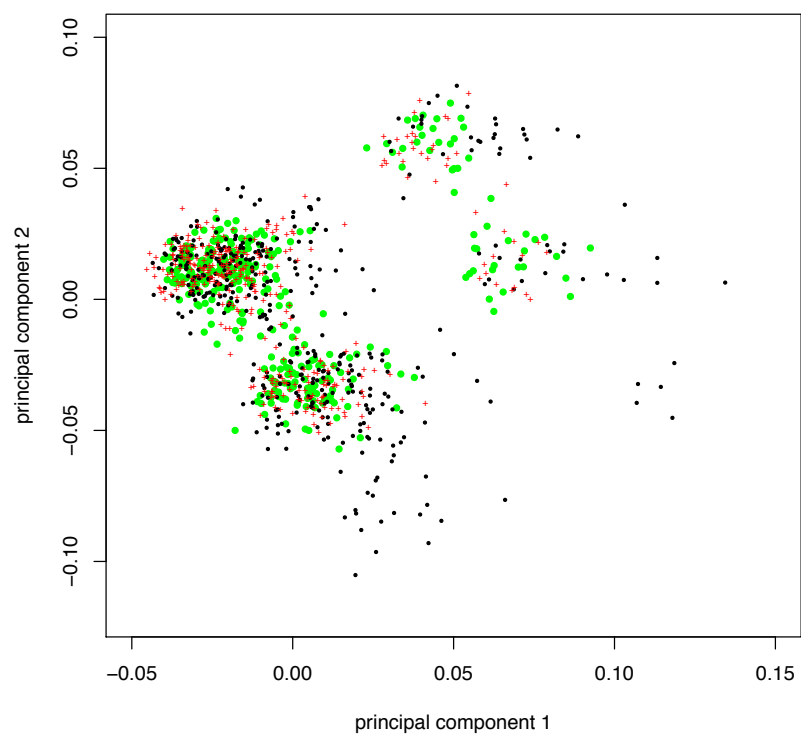

Figure S2

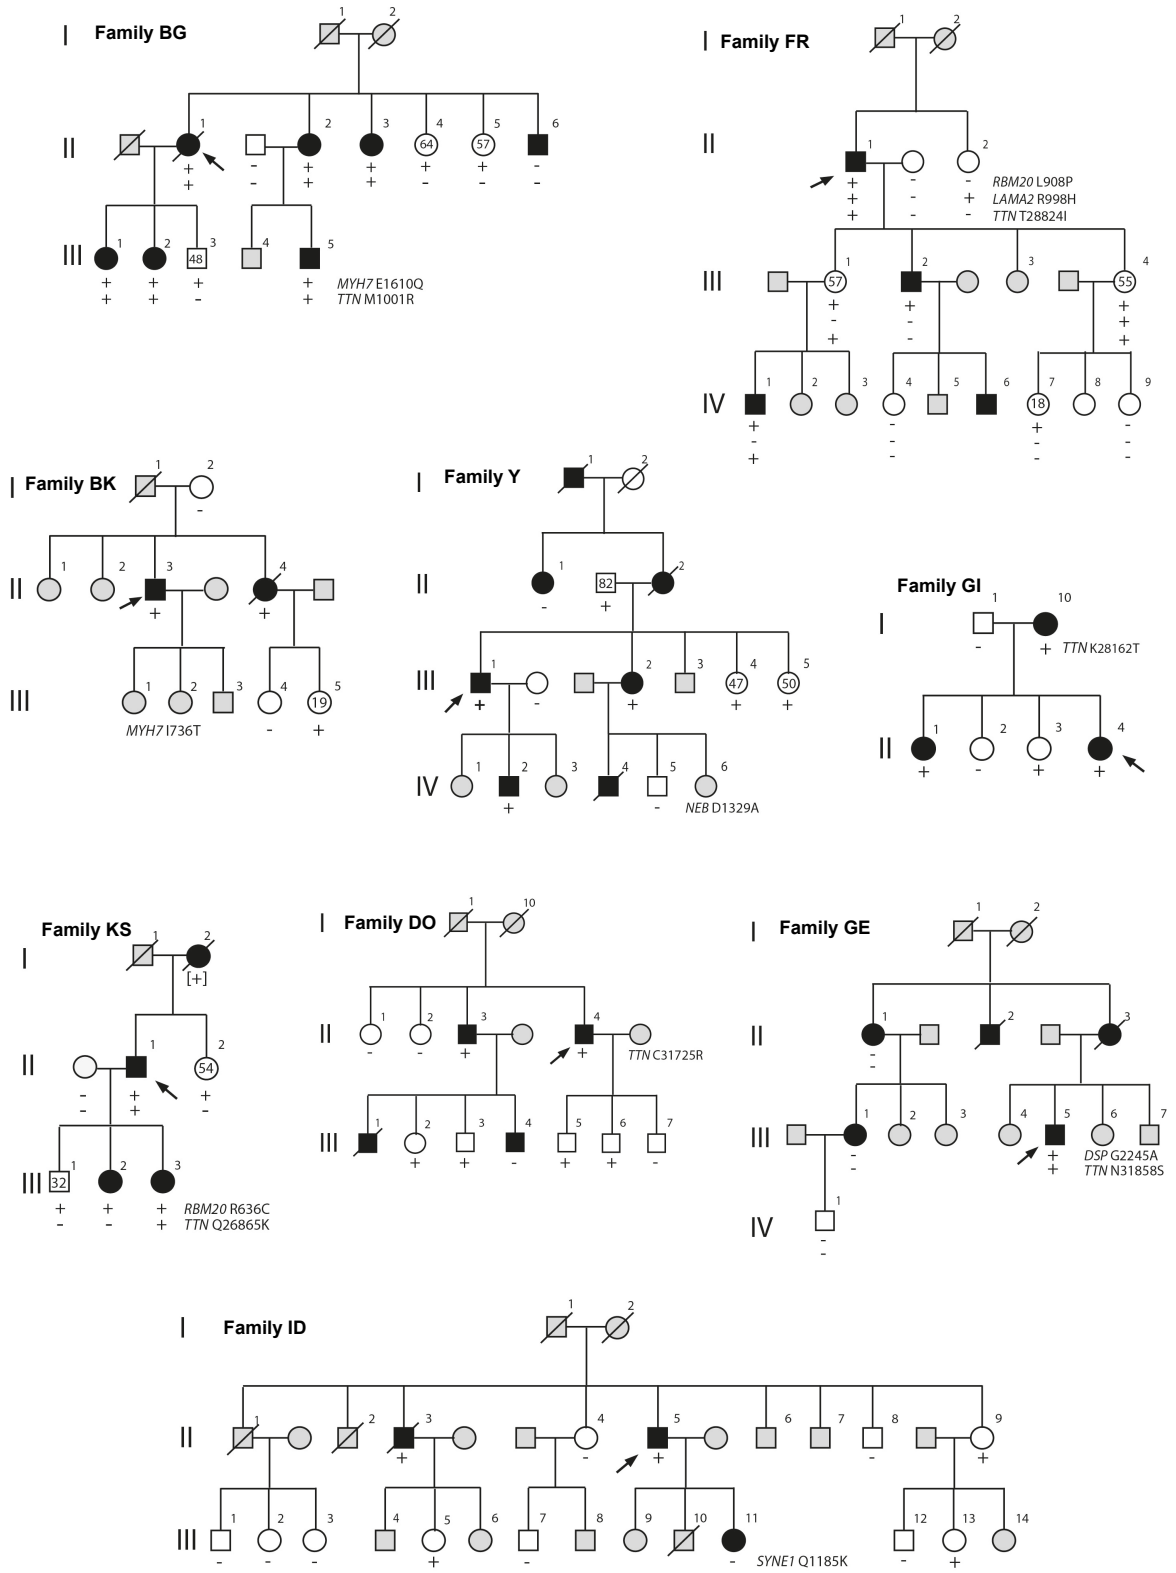

Figure S3

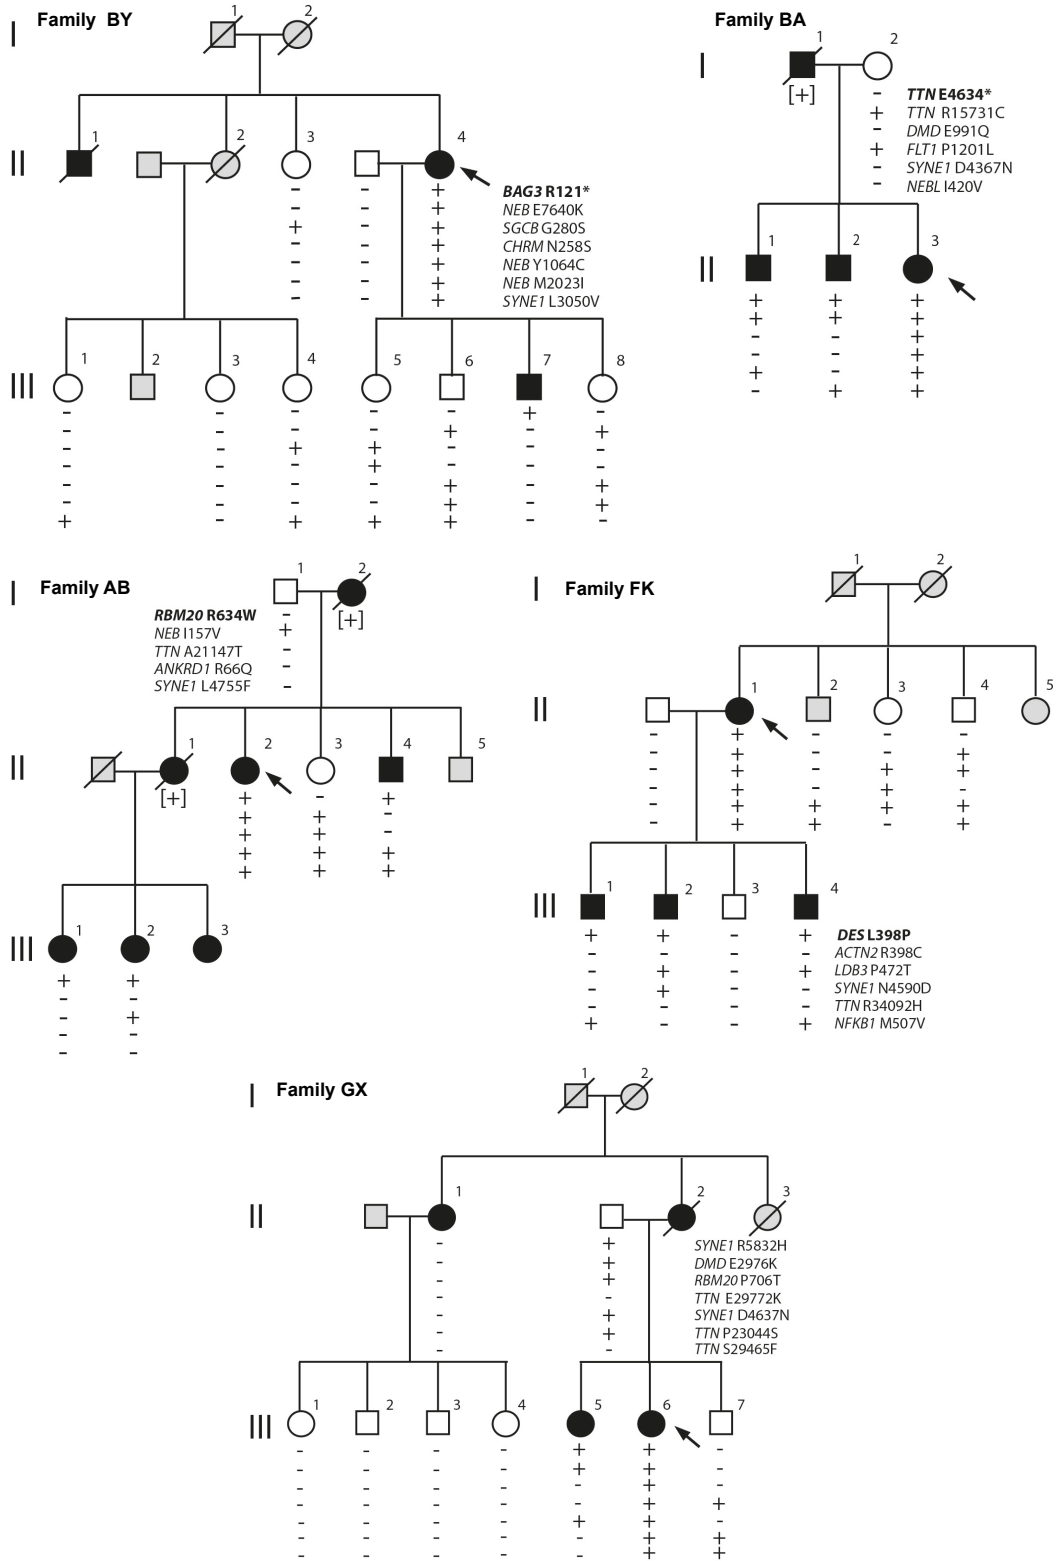

Figure S4

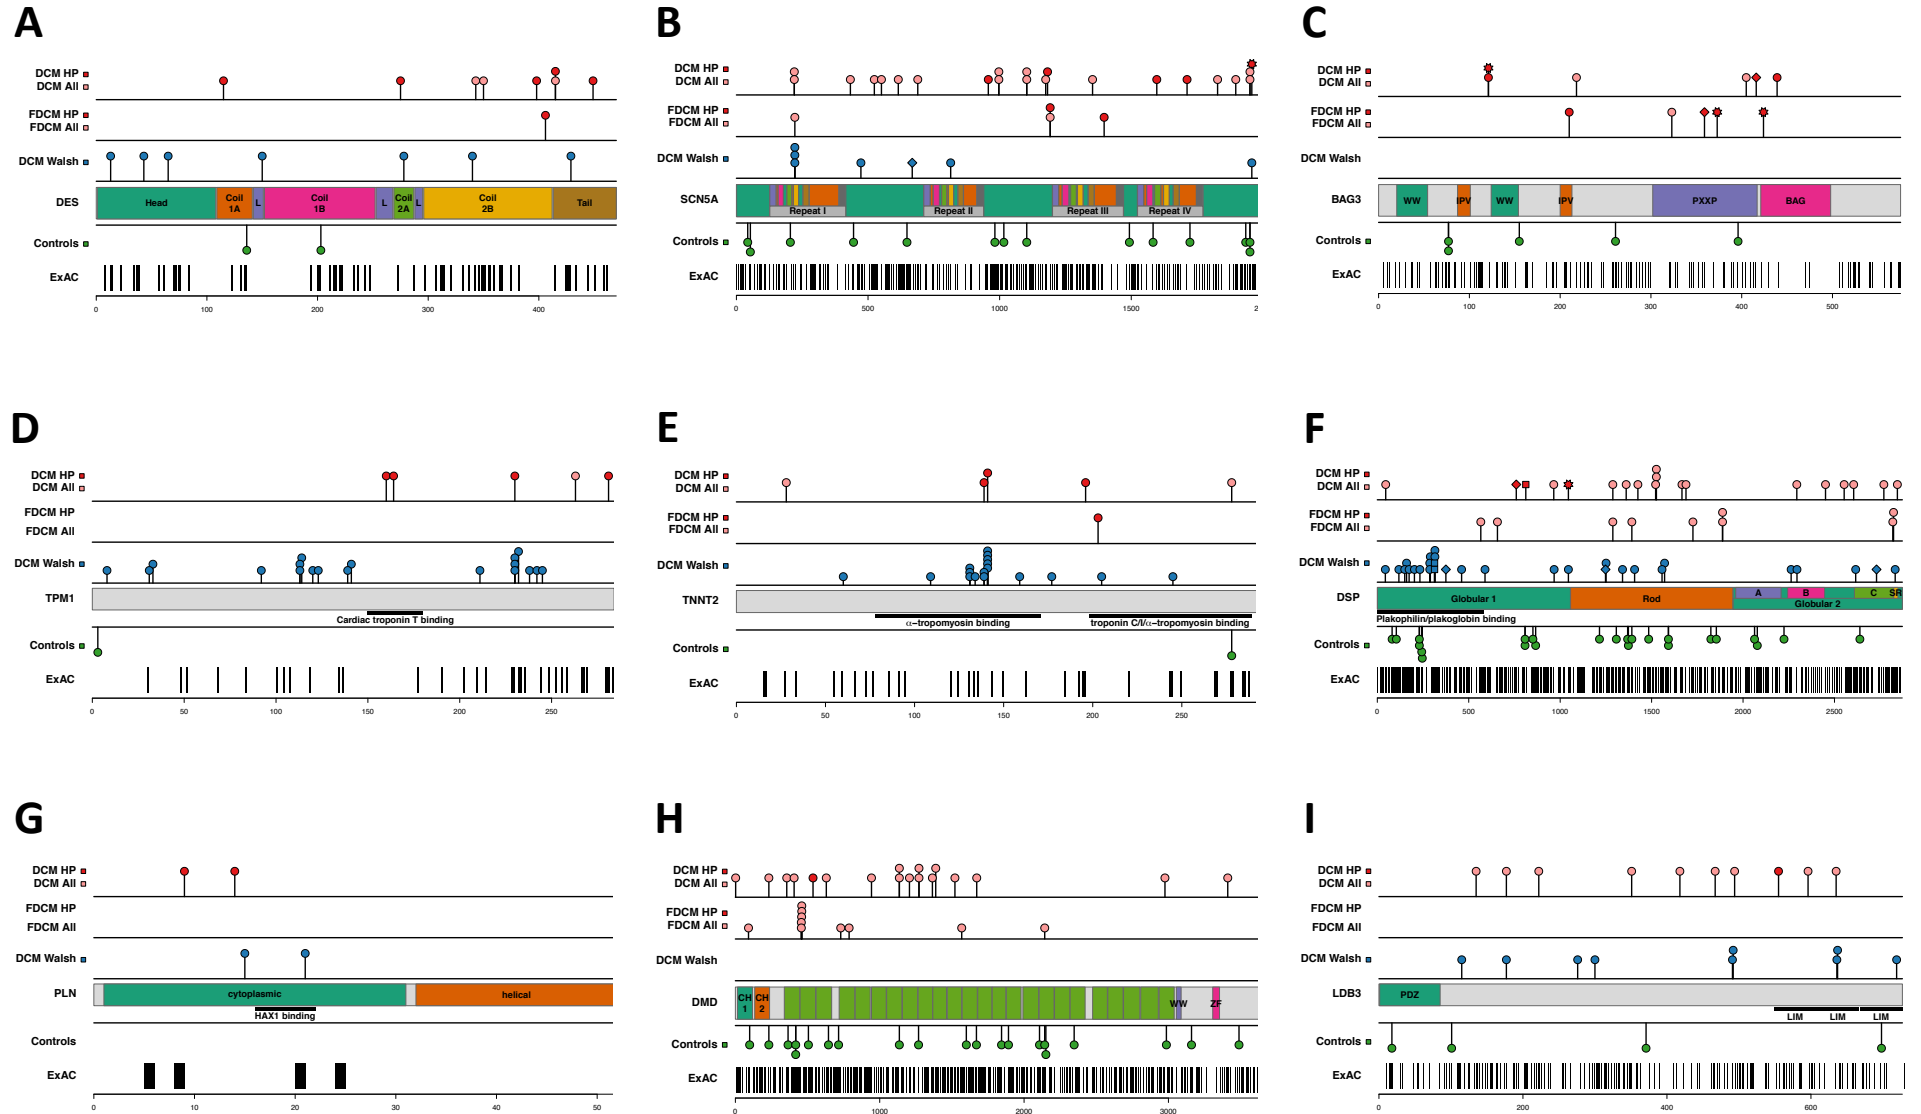

**Table S1.** Yield of rare (MAF < 0.1%) variants per gene in DCM patients and control subjects.

| Gene          | Variants (n=770) in DCM cases |          |     | Variants (n=589) in control subjects |          |     |
|---------------|-------------------------------|----------|-----|--------------------------------------|----------|-----|
|               | Truncating                    | Missense | All | Truncating                           | Missense | All |
| <i>TTN</i>    | 83                            | 287      | 370 | 6                                    | 254      | 260 |
| <i>SYNE1</i>  | 0                             | 54       | 54  | 3                                    | 61       | 64  |
| <i>LAMA2</i>  | 2                             | 29       | 31  | 4                                    | 28       | 32  |
| <i>RBM20</i>  | 2                             | 27       | 29* | 0                                    | 10       | 10  |
| <i>MYH7</i>   | 3                             | 24       | 27* | 0                                    | 9        | 9   |
| <i>DSP</i>    | 3                             | 16       | 19  | 0                                    | 23       | 23  |
| <i>MYBPC3</i> | 0                             | 19       | 19  | 1                                    | 14       | 15  |
| <i>SYNM</i>   | 1                             | 18       | 19  | 2                                    | 18       | 20  |
| <i>SCN5A</i>  | 1                             | 17       | 18  | 1                                    | 14       | 15  |
| <i>DMD</i>    | 0                             | 16       | 16  | 0                                    | 20       | 20  |
| <i>ACTN2</i>  | 1                             | 13       | 14  | 0                                    | 11       | 11  |
| <i>LMNA</i>   | 3                             | 11       | 14* | 0                                    | 1        | 1   |
| <i>LAMA4</i>  | 0                             | 13       | 13  | 0                                    | 14       | 14  |
| <i>MYH6</i>   | 0                             | 12       | 12  | 0                                    | 16       | 16  |
| <i>DSG2</i>   | 0                             | 10       | 10  | 0                                    | 10       | 10  |
| <i>LDB3</i>   | 0                             | 10       | 10  | 0                                    | 4        | 4   |
| <i>DES</i>    | 0                             | 8        | 8   | 0                                    | 2        | 2   |
| <i>NEXN</i>   | 0                             | 8        | 8   | 0                                    | 4        | 4   |
| <i>DTNA</i>   | 1                             | 6        | 7   | 0                                    | 2        | 2   |
| <i>VCL</i>    | 1                             | 6        | 7   | 0                                    | 9        | 9   |
| <i>BAG3</i>   | 2                             | 4        | 6   | 0                                    | 4        | 4   |
| <i>ILK</i>    | 1                             | 5        | 6   | 0                                    | 6        | 6   |
| <i>FKTN</i>   | 0                             | 5        | 5   | 1                                    | 1        | 2   |
| <i>TNNT2</i>  | 0                             | 5        | 5   | 0                                    | 1        | 1   |
| <i>TPM1</i>   | 0                             | 5        | 5   | 1                                    | 1        | 2   |
| <i>SDHA</i>   | 1                             | 3        | 4   | 1                                    | 5        | 6   |
| <i>TCAP</i>   | 0                             | 4        | 4   | 0                                    | 2        | 2   |
| <i>ABCC9</i>  | 1                             | 2        | 3   | 0                                    | 4        | 4   |
| <i>ACTC1</i>  | 0                             | 3        | 3   | 0                                    | 0        | 0   |
| <i>ANKRD1</i> | 0                             | 3        | 3   | 0                                    | 6        | 6   |
| <i>LAMP2</i>  | 1                             | 2        | 3   | 0                                    | 1        | 1   |
| <i>PDLIM3</i> | 0                             | 3        | 3   | 0                                    | 4        | 4   |
| <i>TNNC1</i>  | 0                             | 3        | 3   | 0                                    | 0        | 0   |
| <i>CRYAB</i>  | 0                             | 2        | 2   | 0                                    | 1        | 1   |
| <i>PLN</i>    | 0                             | 2        | 2   | 0                                    | 0        | 0   |
| <i>SGCD</i>   | 0                             | 2        | 2   | 0                                    | 3        | 3   |
| <i>TNNI3</i>  | 1                             | 1        | 2   | 1                                    | 1        | 2   |
| <i>CAV3</i>   | 0                             | 1        | 1   | 0                                    | 2        | 2   |
| <i>CSRP3</i>  | 0                             | 1        | 1   | 0                                    | 0        | 0   |
| <i>FXN</i>    | 0                             | 1        | 1   | 2                                    | 0        | 2   |
| <i>TAZ</i>    | 0                             | 1        | 1   | 0                                    | 0        | 0   |

\*  $P < 0.05$  compared with controls (2x2 chi-squared test; all *TTN* variants excluded).



**Table S2.** Characteristics of *TTN*tv identified in DCM cases.

| Genomic position (Hg19) | Transcript effect  | Protein effect | Protein domain | Exon; PSI | Sample ID      | Ref.             | MAF (ExAC)  |
|-------------------------|--------------------|----------------|----------------|-----------|----------------|------------------|-------------|
| 179639647               | c.6790+1G>T        |                | I-band         | 29;1.00   | 10JL01453      |                  | Absent      |
| 179623709               | c.10303+2T>C       |                | I band         | 44;1.00   | 10CP01917      |                  | 0.000008253 |
| 179606048               | c.11912G>A         | p.Trp3971*     | I-band, N2B    | 49;0.95   | LW-II-3        | R <sup>a</sup>   | Absent      |
| 179605315               | c.12643_12644delCA | p.Gln4215fs    | I-band, N2B    | 49;0.95   | 10DW00512      | R <sup>a</sup>   | Absent      |
| 179605203               | c.12757C>T         | p.Gln4253*     | I-band, N2B    | 49;0.95   | 14MW01583      | R <sup>a</sup>   | Absent      |
| 179604264               | c.13696C>T         | p.Gln4566*     | I-band, N2B    | 49;0.95   | HFA-42         | H <sup>a</sup>   | 0.000008294 |
| 179604060               | c.13900G>T         | p.Glu4634*     | I-band, N2B    | 49;0.95   | BA-III-3       | R <sup>a</sup> W | Absent      |
| 179603994               | c.13966C>T         | p.Gln 4656*    | I-band, N2B    | 49;0.95   | DCM-22         | F <sup>a</sup>   | Absent      |
| 179591957               | c.20134delG        | p.Ser6712fs    | I-band         | 70;0.69   | HFA-9          | H <sup>a</sup>   | Absent      |
| 179571660               | c.29062delG        | p.Ala9688fs    | I-band, N2A    | 102;0.88  | 12SK00375      | R <sup>a</sup>   | Absent      |
| 179558736               | c.31427-1G>A       |                | I-band         | 119;0.79  | D13KD          | H <sup>a</sup>   | Absent      |
| 179554624               | c.31763-1G>A       |                | I-band, PEVK   | 123;0.88  | 12PB00376      | R <sup>a</sup>   | 0.00027334  |
| 179547630               | c.32888-1delG      |                | I-band         | 136;0.86  | 10SB00367      | R <sup>a</sup>   | Absent      |
| 179506963               | c.40558+1G>A       |                | I-band, PEVK   | 220;0.96  | HFA-26, HFA-41 | H <sup>a</sup>   | 0.0001195   |
| 179498590               | c.42636del         | p.Ala14213fs   | I-band         | 232;0.98  | FW-II-1        | R <sup>a</sup>   | Absent      |
| 179498055               | c.42947-2A>G       |                | I-band         | 234;0.97  | MIY-11         | H <sup>a</sup>   | Absent      |
| 179497076               | c.43544_43545insA  | p.Ala14514fs   | I-band         | 237;0.98  | MDT-11         | H <sup>a</sup>   | 0.00003414  |
| 179495982               | c.43792delG        | p.Val14598*    | I-band         | 238;0.96  | 10JM01592      | R <sup>a</sup>   | Absent      |
| 179494967               | c.44281+1G>A       |                | I-band         | 240;0.96  | 20MC01968      | R <sup>a</sup>   | 0.00000831  |
| 179494168               | c.44284C>T         | p.Arg14762*    | I-band         | 241;0.96  | KI-III-2       | R <sup>a</sup>   | Absent      |
| 179487495               | c.44816-1G>A       |                | I-band         | 244;0.96  | 10BM02061      | C                | 0.00001637  |
| 179486244               | c.45307C>T         | p.Arg15103*    | I-band         | 246;0.97  | 12RH00086      | W                | Absent      |
| 179485580               | c.45756dupA        | p.Tyr15253fs   | I-band         | 248;0.97  | 10BC00144      |                  | Absent      |
| 179485525               | c.45812T>G         | p.Leu15271*    | I-band         | 248;0.97  | 10WS00448      | R <sup>a</sup>   | Absent      |
| 179483495               | c.46782C>A         | p.Tyr15594*    | I-band         | 252;0.89  | 20JH01781      | R <sup>a</sup> W | Absent      |
| 179482120               | c.47692C>T         | p.Arg15898*    | I-band         | 255;0.86  | AP-III-4       | R <sup>a</sup>   | 0.00001504  |
| 179480145               | c.48527G>A         | p.Trp16176*    | A-band         | 260;0.96  | 10CH00929      | R <sup>a</sup>   | Absent      |
| 179478864               | c.49259delA        | p.Glu16420fs   | A-band         | 263;0.96  | HFA-68         | H <sup>a</sup>   | Absent      |
| 179478665               | c.49346-1G>A       |                | A-band         | 264;0.95  | 20JB01501      | R <sup>a</sup>   | Absent      |

|           |                              |              |        |          |                            |                               |             |
|-----------|------------------------------|--------------|--------|----------|----------------------------|-------------------------------|-------------|
| 179478552 | c.49458G>A                   | p.Trp16486*  | A-band | 264;0.95 | MO-II-2                    | R <sup>a</sup>                | Absent      |
| 179477885 | c.49648+2delT                |              | A-band | 265;0.96 | DM-III-2, MDD-22, MIV-14   | H <sup>a</sup>                | Absent      |
| 179477082 | c.50170C>T                   | p.Arg16724*  | A-band | 267;0.93 | 10RN00513                  | R <sup>a</sup>                | Absent      |
| 179472127 | c.53287+1G>T                 |              | A-band | 278;0.94 | HFA-71                     | H <sup>a</sup>                | Absent      |
| 179466192 | c.55525_55531delGACAG<br>GA  | p.Asp18509fs | A-band | 288;0.91 | 10JF01881                  | R <sup>a</sup>                | Absent      |
| 179464422 | c.56206delA                  | p.Thr18736fs | A-band | 290;0.96 | FQ-III-11                  | R <sup>a</sup>                | Absent      |
| 179463603 | c.56834delG                  | p.Gly18945fs | A-band | 292;0.94 | BM-III-25                  | R <sup>a</sup>                | Absent      |
| 179458947 | c.58172delA                  | p.Asp19391fs | A-band | 298;0.90 | 20PD01505                  | R <sup>a</sup>                | Absent      |
| 179458293 | c.58732+2T>C                 |              | A-band | 299;0.89 | 10AL00811                  | R <sup>a</sup>                | Absent      |
| 179458075 | c.58858delC                  | p.Glu19619fs | A-band | 300;0.90 | HFA-63                     | H <sup>a</sup>                | Absent      |
| 179457380 | c.59352delT                  | p.Glu19785fs | A-band | 302;0.90 | AM-III-7                   | R <sup>a</sup>                | Absent      |
| 179457005 | c.40558G>C                   |              | A-band | 303;0.91 | DCM_UK_B12                 | H <sup>a</sup>                | Absent      |
| 179455162 | c.61290T>A                   | p.Cys20430*  | A-band | 305;0.97 | MEH-11                     | H <sup>a</sup>                | Absent      |
| 179454957 | c.61495C>T                   | p.Arg20499*  | A-band | 305;0.97 | MDJ-21                     | H <sup>a</sup> W              | Absent      |
| 179454576 | c.61876C>T                   | p.Arg20626*  | A-band | 305;0.97 | MEW-11                     | H <sup>a</sup>                | 0.00006641  |
| 179453427 | c.63025C>T                   | p.Arg21009*  | A-band | 305;0.97 | 10TM00933                  | R <sup>a</sup> W              | Absent      |
| 179452435 | c.63601C>T                   | p.Arg21201*  | A-band | 307;0.91 | MAO-92, 20EG01127          | H <sup>a</sup>                | 0.000008362 |
| 179450018 | c.64453G>A                   | p.Arg21485*  | A-band | 310;0.91 | DCM_UK_B4                  | W                             | 0.00002508  |
| 179441649 | c.69412+1G>A                 |              | A-band | 325;0.93 | DCM_UK_B2                  | H <sup>a</sup>                | Absent      |
| 179441479 | c.69491_69492_delGT          | p.Val23164fs | A-band | 326;0.94 | CS-III-12                  | R <sup>a</sup>                | Absent      |
| 179441341 | c.69630C>A                   | p.Tyr23210*  | A-band | 326;0.94 | 10CS01472                  | R <sup>a</sup>                | Absent      |
| 179438189 | c.72668delT                  | p.Pro24223fs | A-band | 327;0.95 | MEK-111                    | H <sup>a</sup>                | Absent      |
| 179435975 | c.74880_74883insACTT         | p.Pro24962fs | A-band | 327;0.95 | DI-II-6                    | R <sup>a</sup>                | Absent      |
| 179434743 | c.76115insA                  | p.Asn25372fs | A-band | 327;0.95 | CT-II-2, R-IV-2, 20SF01123 | R <sup>a</sup>                | Absent      |
| 179433758 | c.77101_77102insT            | p.Gln25700fs | A-band | 327;0.95 | HFA-57                     | H <sup>a</sup>                | Absent      |
| 179432761 | c.78095_78098delAAAG         | p.Arg26032fs | A-band | 327;0.95 | AV-IV-2                    | R <sup>a</sup> F <sup>a</sup> | Absent      |
| 179432675 | c.78184G>T                   | p.Glu26062*  | A-band | 327;0.95 | 10BK01803                  | R <sup>a</sup>                | Absent      |
| 179432351 | c.78507delT                  | p.Gly26170fs | A-band | 327;0.95 | 10JC00262                  | R <sup>a</sup>                | Absent      |
| 179431868 | c.78991C>T                   | p.Arg26331*  | A-band | 327;0.95 | BR-IV-1, EA-II-7           | R <sup>a</sup> F <sup>a</sup> | Absent      |
| 179429589 | c.81262_81269delCAGATG<br>CT | p.Gln27088fs | A-band | 327;0.95 | 10PP00413, 10DM00077       | R <sup>a</sup>                | Absent      |
| 179429538 | c.81321C>G                   | p.Tyr27107*  | A-band | 327;0.95 | 12NP00167                  | R <sup>a</sup>                | Absent      |
| 179429340 | c.81518delC                  | p.Pro27173fs | A-band | 327;0.95 | 20DH01701                  | R <sup>a</sup>                | Absent      |

|           |                        |              |        |          |                        |                               |             |
|-----------|------------------------|--------------|--------|----------|------------------------|-------------------------------|-------------|
| 179428345 | c.82513delA            | p.Ile27505fs | A-band | 327;0.95 | 10CP00605              | R <sup>a</sup>                | Absent      |
| 179426483 | c.84376C>T             | p.Gln28126*  | A-band | 327;0.95 | LT-II-1                | R <sup>a</sup>                | Absent      |
| 179425091 | c.85768C>T             | p.Arg28590*  | A-band | 327;0.95 | MGW-11                 | H <sup>a</sup>                | Absent      |
| 179424496 | c.86363G>A             | p.Trp28788*  | A-band | 327;0.95 | MIP-13                 | H <sup>a</sup>                | Absent      |
| 179424036 | c.86821+2T>A           |              | A-band | 327;0.95 | MIA-1                  | H <sup>a</sup> WN             | 0.000008913 |
| 179423219 | c.86967G>A             | p.Trp28989*  | A-band | 328;0.96 | 12JL00046              | R <sup>a</sup>                | Absent      |
| 179422457 | c.87624C>A             | p.Tyr29208*  | A-band | 329;0.95 | DCM_UK_B6              | H <sup>a</sup>                | Absent      |
| 179413670 | c.92683C>T             | p.Arg30895*  | A-band | 340;0.98 | 10KF00073              | R <sup>a</sup>                | Absent      |
| 179412902 | c.93451G>T             | p.Glu31151*  | A-band | 340;0.98 | MBG_121                | H <sup>a</sup>                | Absent      |
| 179412874 | c.93479G>A             | p.Trp31160*  | A-band | 340;0.98 | 10AH00506              |                               | Absent      |
| 179412245 | c.94103_94107delTTAAA  | p.Thr31366fs | A-band | 340;0.98 | HFA-46                 | H <sup>a</sup>                | 0.000008475 |
| 179411592 | c.94562dupC            | p.Thr31522fs | A-band | 342;0.98 | 20JM01785              | R <sup>a</sup>                | Absent      |
| 179410799 | c.95164C>T             | p.Gln31722*  | A-band | 344;0.99 | MHQ-12                 | H <sup>a</sup>                | Absent      |
| 179410544 | c.95415_95416+2delCAGT |              | A-band | 344;0.99 | 10KW01906              | R <sup>a</sup>                | Absent      |
| 179406990 | c.97492+1G>C           |              | A-band | 350;1.00 | DCM-30, HFA-66, HFA-83 | H <sup>a</sup> F <sup>a</sup> | Absent      |
| 179404523 | c.98265_98268dupAACA   | p.His32757fs | A-band | 353;1.00 | 10CS01784              | R <sup>a</sup> W              | Absent      |
| 179403522 | c.99034A>T             | p.Lys33012*  | A-band | 355;1.00 | MHX-11                 | H <sup>a</sup>                | Absent      |
| 179401029 | c.100445C>A            | p.Ser33482*  | A-band | 358;0.99 | 20JR01203              | H <sup>a</sup> R <sup>a</sup> | Absent      |
| 179400319 | c.101021_101022delGA   | p.Arg33674fs | A-band | 359;1.00 | 20RD01346              | R <sup>a</sup>                | Absent      |
| 179399346 | c.101996G>A            | p.Trp33999*  | A-band | 359;1.00 | 14CT01557              | R <sup>a</sup>                | Absent      |
| 179393848 | c.106629delA           | p.Ala35544fs | A-band | 361;0.99 | 12PF00041              | R <sup>a</sup>                | Absent      |
| 179393000 | c.107377+1G>A          |              | A-band | 362;1.00 | 20JM01785              | R <sup>a</sup>                | 0.00001661  |

MAF (ExAC), minor allele frequency in the Exome Aggregation Consortium database; PSI, proportion spliced-in.

<sup>a</sup>This patient reported previously; H = Herman<sup>2</sup>, R = Roberts<sup>3</sup>, F = Fatkin<sup>4</sup>, W = Walsh<sup>1</sup>, C = Ceyhan-Birsoy<sup>5</sup>.

**Table S3.** Characteristics of rare missense variants in *TTN* and 40 other cardiomyopathy genes.

| Parameter                                               | <i>TTN</i> gene         |                             |                   | Other cardiomyopathy genes |                             |                   |
|---------------------------------------------------------|-------------------------|-----------------------------|-------------------|----------------------------|-----------------------------|-------------------|
|                                                         | DCM<br>(n=287 variants) | Control<br>(n=254 variants) | <i>P</i><br>value | DCM<br>(n=375 variants)    | Control<br>(n=312 variants) | <i>P</i><br>value |
| Novel (EA-ESP)                                          | 163 (57%)               | 141(56%)                    | 0.79              | 235 (63%)                  | 193 (62%)                   | 0.87              |
| Novel (ExAC)                                            | 76 (27%)                | 50 (20%)                    | 0.07              | 121 (32%)                  | 58 (19%)                    | <0.0001           |
| Deleterious (PolyPhen2/SIFT/PROVEAN)                    | 100 (35%)               | 95 (37%)                    | 0.59              | 134 (36%)                  | 80 (26%)                    | 0.005             |
| Deleterious (MetaSVM)                                   | 49 (17%)                | 42 (17%)                    | 0.91              | 152 (41%)                  | 80 (26%)                    | <0.0001           |
| Novel (ExAC) + deleterious (PolyPhen2/<br>SIFT/PROVEAN) | 26 (9%)                 | 18 (7%)                     | 0.43              | 61 (16%)                   | 16 (5%)                     | <0.0001           |
| Novel (ExAC) + deleterious (MetaSVM)                    | 16 (6%)                 | 8 (3%)                      | 0.21              | 71 (19%)                   | 15 (5%)                     | <0.0001           |

**Table S4.** Distribution across RVIS percentiles of truncating and missense variants in 40 cardiomyopathy genes (*TTN* excluded).

|                                                 | RVIS percentile |      |      |       | P value<br>(2x4)* | Residuals |       |       |       | Standardized residuals |       |       |       |
|-------------------------------------------------|-----------------|------|------|-------|-------------------|-----------|-------|-------|-------|------------------------|-------|-------|-------|
|                                                 | 25th            | 50th | 75th | 100th |                   | 25th      | 50th  | 75th  | 100th | 25th                   | 50th  | 75th  | 100th |
| <i>All variants</i>                             |                 |      |      |       |                   |           |       |       |       |                        |       |       |       |
| DCM                                             | 205             | 78   | 17   | 81    | 0.75              | 0.11      | -0.60 | 0.10  | 0.39  | 0.24                   | -1.01 | 0.16  | 0.66  |
| Control                                         | 163             | 73   | 13   | 60    |                   | -0.12     | 0.67  | -0.11 | -0.44 | -0.24                  | 1.01  | -0.16 | -0.66 |
| <i>Truncating variants</i>                      |                 |      |      |       |                   |           |       |       |       |                        |       |       |       |
| DCM                                             | 16              | 0    | 4    | 4     | 0.01              | 1.05      | -1.36 | 0.53  | -1.06 | 2.43                   | -2.28 | 0.91  | -2.03 |
| Control                                         | 4               | 3    | 1    | 7     |                   | -1.33     | 1.72  | -0.67 | 1.35  | -2.43                  | 2.28  | -0.91 | 2.03  |
| <i>Missense variants</i>                        |                 |      |      |       |                   |           |       |       |       |                        |       |       |       |
| DCM                                             | 189             | 78   | 13   | 77    | 0.67              | -0.15     | -0.36 | -0.20 | 0.72  | -0.33                  | -0.61 | -0.30 | 1.19  |
| Control                                         | 159             | 70   | 12   | 53    |                   | 0.17      | 0.40  | 0.22  | -0.79 | 0.33                   | 0.61  | 0.30  | -1.19 |
| <i>Missense variants, novel (ExAC)</i>          |                 |      |      |       |                   |           |       |       |       |                        |       |       |       |
| DCM                                             | 69              | 22   | 5    | 25    | 0.49              | 0.16      | -0.65 | -0.20 | 0.51  | 0.43                   | -1.31 | -0.36 | 1.01  |
| Control                                         | 30              | 15   | 3    | 8     |                   | -0.24     | 0.96  | 0.29  | -0.76 | -0.43                  | 1.31  | 0.36  | -1.01 |
| <i>Missense variants, deleterious (MetaSVM)</i> |                 |      |      |       |                   |           |       |       |       |                        |       |       |       |
| DCM                                             | 94              | 19   | 7    | 28    | 0.29              | -0.16     | -0.03 | 1.11  | -0.12 | -0.47                  | -0.05 | 1.93  | -0.23 |
| Control                                         | 51              | 10   | 0    | 16    |                   | 0.23      | 0.04  | -1.54 | 0.17  | 0.47                   | 0.05  | -1.93 | 0.23  |
| <i>Missense variants, novel + deleterious</i>   |                 |      |      |       |                   |           |       |       |       |                        |       |       |       |
| DCM                                             | 47              | 8    | 4    | 12    | 0.15              | 0.24      | -0.83 | 0.38  | 0.13  | 0.94                   | -2.17 | 0.94  | 0.34  |
| Control                                         | 8               | 5    | 0    | 2     |                   | -0.51     | 1.81  | -0.84 | -0.28 | -0.94                  | 2.17  | -0.94 | -0.34 |

\* A 2 x 4 chi-square test was used to assess differences between cases and controls across different RVIS percentiles. To identify the cells that contribute most to the statistical significant results, raw residuals were obtained by subtracting expected from observed values and standardized residuals were calculated by dividing the raw residuals by the square root of the residual cell variance. The standardized residuals follow a standard normal distribution so any deviations from +2 or -2 corresponds to statistical significance and lack of fit of null hypothesis in that cell.

**Table S5.** Evidence from animal models implicating different genes in DCM pathogenesis.

| Gene         | Protein                       | Gene group | DCM in mouse model                                                       |                               | Other species                                                  |
|--------------|-------------------------------|------------|--------------------------------------------------------------------------|-------------------------------|----------------------------------------------------------------|
|              |                               |            | Loss-of-function*                                                        | Human NS mutation             |                                                                |
| <i>MYH7</i>  | Myosin heavy chain 7          | A          | See <i>MYH6</i> †; no murine <i>myh7</i> KO                              | Adult KI† mice                | Zebrafish embryo morphants<br>Adult fly morphants              |
| <i>DSP</i>   | Desmoplakin                   | A          | KO mice: EL (-/-), adult biV ARVC (+/-); cKO mice: adult biV ARVC (-/-)  | Adult Tg mice (ARVC mutation) |                                                                |
| <i>SCN5A</i> | Cardiac sodium channel        | A          | KO mice: EL (-/-); normal FS (+/-); adult Tg mice (80-90% ↓protein): DCM | Adult KI mice                 | Zebrafish embryo MO: developmental defects                     |
| <i>LMNA</i>  | Lamin A/C                     | A          | KO mice: NN DCM/death (-/-); adult DCM (+/-)                             | Adult KI mice                 | Zebrafish embryo MO                                            |
| <i>LDB3</i>  | LIM domain binding protein 3  | A          | KO mice: NN death (-/-); adult cKO mice (-/-)                            | Adult Tg mice                 | Zebrafish embryo MO: thin ventricular walls                    |
| <i>DMD</i>   | Dystrophin                    | A          | Adult mdx mice                                                           | NA                            | KO flies                                                       |
| <i>DES</i>   | Desmin                        | A          | Adult KO mice: DCM (-/-)                                                 | Adult KI mice                 | Zebrafish embryo MO                                            |
| <i>TPM1</i>  | Tropomyosin $\alpha$ -1 chain | A          | KO mice: EL (-/-), normal systolic function (+/-).                       | Adult Tg mice                 |                                                                |
| <i>TNNC1</i> | Troponin C                    | A          | KI mice (D73N, Ca <sup>2+</sup> desensitizer): EL (-/-), adult DCM (+/-) | NA                            | Zebrafish embryo morphant: developmental defects, ↓contraction |
| <i>TNNT2</i> | Troponin T                    | A          | KO mice: DCM, NN death (-/-), normal FS (+/-).                           | Adult Tg mice                 | Zebrafish embryo morphants/MO                                  |
| <i>BAG3</i>  | BCL-2 associated athanogene   | A          | KO mice: NN death (-/-)                                                  | Adult Tg mice                 | Zebrafish embryo MO: ↓contraction, PE                          |
| <i>PLN</i>   | Phospholamban                 | A          | Adult Tg mice (over-expression): DCM; KO mice: hypercontractile (-/-)    | Adult Tg mice                 |                                                                |
| <i>RBM20</i> | RNA-binding protein 20        | A          | NA                                                                       | NA                            | Adult KO rats: LV dilation, normal FS                          |

|               |                                             |   |                                                                              |                                           |                                                                                                                             |
|---------------|---------------------------------------------|---|------------------------------------------------------------------------------|-------------------------------------------|-----------------------------------------------------------------------------------------------------------------------------|
| <i>TTN</i>    | Titin                                       | A | <i>TTN</i> tv Tg mice: EL (-/-), adult stress-induced DCM (+/-)              | NA                                        | Zebrafish embryo morphants: ↓ contraction, PE (-/-), normal contraction (+/-); Adult <i>TTN</i> tv rats: stress-induced DCM |
| <i>VCL</i>    | Vinculin                                    | B | KO mice: EL (-/-); adult stress-induced DCM (+/-); cKO mice: adult DCM (-/-) | NA                                        | Zebrafish embryo MO                                                                                                         |
| <i>LAMA4</i>  | Laminin subunit $\alpha$ -4                 | B | Adult KO mice: LVH, late DCM (-/-)                                           | NA                                        | Zebrafish embryo MO: PE                                                                                                     |
| <i>ILK</i>    | Integrin-linked protein kinase              | B | Adult KO mice (-/-); adult cKO mice (-/-)                                    | NA                                        | Zebrafish embryo MO: cardiac developmental defects; zebrafish embryo morphant: ↓ contraction, PE                            |
| <i>MYBPC3</i> | Cardiac myosin binding protein 3            | B | KO/KI mice: NN/adult DCM, LVH (-/-), normal adult FS, $\pm$ LVH (+/-)        | NA                                        | Zebrafish embryo MO: ventricular hypertrophy, normal contraction, PE                                                        |
| <i>CSRP3</i>  | Muscle LIM protein                          | B | KO mice: LVH, NN death or adult DCM (-/-); no early phenotype (+/-)          | Adult KI mice: LVH, ↓ contractile reserve | Zebrafish embryo MO                                                                                                         |
| <i>CRYAB</i>  | $\alpha\beta$ -crystallin                   | B | NA                                                                           | Adult Tg mice: LVH, late DCM              | Zebrafish embryo MO: ↓ contraction, PE; NS mutant flies                                                                     |
| <i>ACTC1</i>  | Cardiac actin                               | B | KO mice: EL/NN death (-/-)                                                   | Adult Tg mice                             | Zebrafish embryo morphants: cardiac dilation/development defects, ↑ contraction, PE                                         |
| <i>NEXN</i>   | Nexilin                                     | B | KO mice: DCM, EFE, NN death (-/-), normal adult FS (+/-)                     | NA                                        | Zebrafish embryo MO/injected morphants                                                                                      |
| <i>TAZ</i>    | Tafazzin                                    | B | Adult iKO mice (-/-)                                                         | NA                                        | Zebrafish embryo MO: developmental defects, PE                                                                              |
| <i>LAMP2</i>  | Lysosome-associated membrane glycoprotein 2 | B | Adult KO mice: ↑ HW/BW, ↓ myofibril force (-/-)                              | NA                                        |                                                                                                                             |

|               |                                              |   |                                                                                                      |                               |                                                            |
|---------------|----------------------------------------------|---|------------------------------------------------------------------------------------------------------|-------------------------------|------------------------------------------------------------|
| <i>TNNI3</i>  | Troponin I                                   | B | KO mice: NN death,<br>↑ myocyte resting tension,<br>↓ Ca <sup>2+</sup> sensitivity (-/-)             | NA                            | Morphant flies                                             |
| <i>ANKRD1</i> | Cardiac ankyrin repeat protein               | B | Adult KO mice: normal FS (-/-)                                                                       | NA                            |                                                            |
| <i>DSG2</i>   | Desmoglein-2                                 | B | KO mice: EL (-/-), viable, no overt changes (+/-); cKO mice: adult RV dilation, histopathology (-/-) | Adult Tg mice (ARVC mutation) |                                                            |
| <i>MYH6</i>   | Myosin heavy chain 6                         | C | KO mice†: EL (-/-), adult ↓ contraction (+/-)                                                        | NA                            | KO xenopus: developmental defects, dilation, ↓ contraction |
| <i>ABCC9</i>  | K <sub>ATP</sub> channel SUR2A subunit       | C | KO mice: DCM, NN death (-/-)                                                                         | NA                            | KO flies: pacing-induced heart failure                     |
| <i>ACTN2</i>  | α-actinin                                    | C | NA                                                                                                   | NA                            | Zebrafish embryo MO: ventricular dilation, thin walls      |
| <i>PDLIM3</i> | PDZ and LIM domain protein 3                 | C | KO mice: adult DCM (RV>LV) (-/-)                                                                     | NA                            |                                                            |
| <i>SGCD</i>   | δ - sarcoglycan                              | C | KO mice: late (>50 weeks) DCM (-/-)                                                                  | Adult KI mice: no DCM         |                                                            |
| <i>SYNE1</i>  | Nesprin-1                                    | C | KASH-deficient mice: no dilation, late (>52 weeks) ↓ contraction (-/-)                               | NA                            |                                                            |
| <i>FXN</i>    | Frataxin                                     | C | KO mice: EL (-/-); cKO mice: adult LVH/DCM (-/-)                                                     | NA                            | KO flies                                                   |
| <i>CAV3</i>   | Caveolin-3                                   | C | No DCM in LOF model, Tg overexpression: adult DCM                                                    | NA                            |                                                            |
| <i>TCAP</i>   | Telethonin                                   | C | Adult KO mice: normal baseline, post-TAC LVH, DCM (-/-), no change (+/-)                             | NA                            | Zebrafish embryo MO                                        |
| <i>FKTN</i>   | Fukutin                                      | C | KO mice: EL (-/-)                                                                                    | NA                            |                                                            |
| <i>SDHA</i>   | Succinate dehydrogenase flavoprotein subunit | D | NA                                                                                                   | NA                            |                                                            |
| <i>DTNA</i>   | α-dystrobrevin                               | D | Adult KO mice: no DCM,                                                                               | NA                            |                                                            |



|              |                             |   | isoproterenol-induced<br>↑mortality (-/-) |    |  |
|--------------|-----------------------------|---|-------------------------------------------|----|--|
| <i>LAMA2</i> | Laminin subunit $\alpha$ -2 | D | KO mice: SKM (-/-)                        | NA |  |
| <i>SYNM</i>  | Synemin                     | D | KO mice: SKM (-/-)                        | NA |  |

\* Most studies have evaluated homozygous gene loss-of-function models; data from heterozygous mice are shown when available.

†  $\alpha$ -MHC is major myosin isoform in murine ventricle: human *MYH7* mutations modelled in murine *myh6* gene.

ARVC, arrhythmogenic right ventricular cardiomyopathy; biV, biventricular; cKO, cardiac-specific knockout; DCM, dilated cardiomyopathy; EFE, endocardial fibroelastosis; EL, embryonic lethal; FS, fractional shortening; HW/BW, heart weight: body weight ratio; iKO, inducible knockout; KASH, Klarsicht Anc-1 Syne Homology domain; KI, knock-in; KO, knockout; LV, left ventricle; LVH, left ventricular hypertrophy; MO, morpholino; NA, not available; NN, neonatal; NS, non-synonymous variant; PE, pericardial effusion; RV, right ventricle; SKM, skeletal myopathy; TAC, transverse aortic constriction; Tg, transgenic; *TTN*tv, truncating variants in the *TTN* (titin) gene.

**Table S6.** Distribution across gene groups of truncating and missense variants in 40 cardiomyopathy genes (*TTN* excluded).

|                                                 | Gene group |    |     |    | P value<br>(2x4)* | Residuals |       |       |       | Standardized residuals |       |       |       |
|-------------------------------------------------|------------|----|-----|----|-------------------|-----------|-------|-------|-------|------------------------|-------|-------|-------|
|                                                 | A          | B  | C   | D  |                   | A         | B     | C     | D     | A                      | B     | C     | D     |
| <i>All variants</i>                             |            |    |     |    |                   |           |       |       |       |                        |       |       |       |
| DCM                                             | 162        | 78 | 99  | 61 | 0.002             | 1.99      | -0.25 | -1.48 | -0.67 | 3.67                   | -0.41 | -2.60 | -1.09 |
| Control                                         | 91         | 68 | 110 | 60 |                   | -2.19     | 0.27  | 1.63  | 0.74  | -3.67                  | 0.41  | 2.60  | 1.09  |
| <i>Truncating variants</i>                      |            |    |     |    |                   |           |       |       |       |                        |       |       |       |
| DCM                                             | 14         | 4  | 2   | 5  | 0.01              | 1.45      | 0.23  | -1.27 | -0.80 | 2.90                   | 0.39  | -2.21 | -1.49 |
| Control                                         | 2          | 2  | 6   | 7  |                   | -1.76     | -0.28 | 1.53  | 0.97  | -2.90                  | -0.39 | 2.21  | 1.49  |
| <i>All missense variants</i>                    |            |    |     |    |                   |           |       |       |       |                        |       |       |       |
| DCM                                             | 148        | 74 | 97  | 56 | 0.018             | 1.66      | -0.29 | -1.23 | -0.46 | 3.05                   | -0.48 | -2.16 | -0.75 |
| Control                                         | 89         | 66 | 104 | 53 |                   | -1.82     | 0.32  | 1.35  | 0.51  | -3.05                  | 0.48  | 2.16  | 0.75  |
| <i>Missense variants, novel (ExAC)</i>          |            |    |     |    |                   |           |       |       |       |                        |       |       |       |
| DCM                                             | 76         | 14 | 25  | 6  | 0.0009            | 1.56      | -1.13 | -0.87 | -0.94 | 3.98                   | -2.17 | -1.76 | -1.72 |
| Control                                         | 18         | 14 | 19  | 7  |                   | -2.26     | 1.64  | 1.26  | 1.36  | -3.98                  | 2.17  | 1.76  | 1.72  |
| <i>Missense variants, deleterious (MetaSVM)</i> |            |    |     |    |                   |           |       |       |       |                        |       |       |       |
| DCM                                             | 85         | 24 | 27  | 16 | 0.0005            | 1.45      | 0.50  | -1.61 | -1.09 | 3.44                   | 0.92  | -3.16 | -2.01 |
| Control                                         | 26         | 9  | 29  | 16 |                   | -2.01     | -0.69 | 2.23  | 1.51  | -3.44                  | -0.92 | 3.16  | 2.01  |
| <i>Missense variants, novel + deleterious</i>   |            |    |     |    |                   |           |       |       |       |                        |       |       |       |
| DCM                                             | 55         | 6  | 8   | 2  | 0.001             | 0.65      | 0.47  | -1.05 | -1.05 | 2.90                   | 1.17  | -2.74 | -2.58 |
| Control                                         | 6          | 0  | 6   | 3  |                   | -1.42     | -1.02 | 2.28  | 2.28  | -2.90                  | -1.17 | 2.74  | 2.58  |

\* A 2 x 4 chi-square test was used to assess differences between cases and controls across different gene groups. To identify the cells that contribute most to the statistical significant results, raw residuals were obtained by subtracting expected from observed values and standardized residuals were calculated by dividing the raw residuals by the square root of the residual cell variance. The standardized residuals follow a standard normal distribution so any deviations from +2 or -2 corresponds to statistical significance and lack of fit of null hypothesis in that cell.

**Table S7.** Damaging\* variants in group A genes identified in DCM cases.

| Gene         | Genomic position(Hg19) | Transcript effect | Protein effect | Protein domain   | Variant carriers | Other studies (no.probands) |
|--------------|------------------------|-------------------|----------------|------------------|------------------|-----------------------------|
| <i>MYH7</i>  | 14:23901919            | c.431G>T          | p.Gly144Val    | Motor            | 10EC00826        | DCM (3)                     |
| <i>MYH7</i>  | 14:23900157            | c.848A>G          | p.Tyr283Cys    | Motor            | DCM-24           | HCM (1)                     |
| <i>MYH7</i>  | 14:23899092            | c.1030G>A         | p.Glu344Lys    | Motor            | 10EH00627        |                             |
| <i>MYH7</i>  | 14:23899016            | c.1106G>A         | p.Arg369Gln    | Motor            | CZ-III-4         | DCM (4)                     |
| <i>MYH7</i>  | 14:23898294            | c.1277C>T         | p.Ala426Val    | Motor            | DCM-2            |                             |
| <i>MYH7</i>  | 14:23898175            | c.1396G>C         | p.Glu466Gln    | Motor switch II  | DCM-23           |                             |
| <i>MYH7</i>  | 14:23897714            | c.1573G>A         | p.Glu525Lys    | Motor            | DCM-UK-B5        | DCM (1)                     |
| <i>MYH7</i>  | 14:23897708            | c.526_+1G>A       |                | Motor            | DF-III-1         |                             |
| <i>MYH7</i>  | 14:23894983            | c.2207T>C         | p.Ile736Thr    | Motor, converter | BK-III-3         | DCM (1), HCM (>10)          |
| <i>MYH7</i>  | 14:23894584            | c.2330G>A         | p.Arg777Lys    | Motor, converter | 20JO01157        |                             |
| <i>MYH7</i>  | 14:23894500            | c.2414T>C         | p.Leu805Pro    | Neck, IQ domain  | 20DH01138        |                             |
| <i>MYH7</i>  | 14:23894204            | c.2453T>A         | p.Ile818Asn    | Neck             | 20RW01823        |                             |
| <i>MYH7</i>  | 14:23894037            | c.2620G>C         | p.Glu874Gln    | Rod/hinge        | DD-III-4         |                             |
| <i>MYH7</i>  | 14:23894036            | c.2621A>T         | p.Glu874Val    | Rod/hinge        | 10LL01020        |                             |
| <i>MYH7</i>  | 14:23892760            | c.3094delG        | p.Asp1032fs    | Rod/hinge        | 12RC00100        |                             |
| <i>MYH7</i>  | 14:23889113            | c.3667G>A         | p.Glu1223Lys   | Hinge            | MDU-111          |                             |
| <i>MYH7</i>  | 14:23885338            | c.4828G>C         | p.Glu1610Gln   | Rod, LMM         | BG-III-1         |                             |
| <i>MYH7</i>  | 14:23884251            | c.5512A>G         | p.Lys1838Glu   | Rod, LMM         | MDJ_21           |                             |
| <i>MYH7</i>  | 14:23884207            | c.5556C>G         | p.Tyr1852*     | Rod, LMM         | 12DB00017        |                             |
| <i>MYH7</i>  | 14:23883041            | c.5717C>G         | p.Ala1906Gly   | Rod, LMM         | DCM-26           |                             |
| <i>RBM20</i> | 10:112544606           | c.1486C>T         | p.Gln496*      |                  | 12PF00041        |                             |
| <i>RBM20</i> | 10:112572055           | c.1900C>T         | p.Arg634Trp    | RS domain        | AB-III-2         | DCM (1)                     |
| <i>RBM20</i> | 10:112572061           | c.1906C>T         | p.Arg636Cys    | RS domain        | KS-II-1, MCH-123 | DCM (1)                     |
| <i>RBM20</i> | 10:112572062           | c.1907G>A         | p.Arg636His    | RS domain        | MAK-13           | DCM (4)                     |
| <i>RBM20</i> | 10:112572068           | c.1913C>T         | p.Pro638Leu    | RS domain        | MJ-11            | DCM (4)                     |
| <i>RBM20</i> | 10:112572419           | c.2264G>A         | p.Arg755His    |                  | 10IP00668        |                             |
| <i>RBM20</i> | 10:112572526           | c.2371C>T         | p.Arg791Trp    |                  | HFA-71           |                             |
| <i>RBM20</i> | 10:112581100           | c.2723T>C         | p.Leu908Pro    | Glutamate-rich   | FR-I-1           |                             |

|              |              |                    |              |                                 |           |              |
|--------------|--------------|--------------------|--------------|---------------------------------|-----------|--------------|
| <i>RBM20</i> | 10:112581114 | c.2737G>A          | p.Glu913Lys  | Glutamate-rich                  | 20RJ01217 | DCM (2)      |
| <i>RBM20</i> | 10:112581427 | c.3051_3054delCTCC | p.Ser1018fs  |                                 | 10LS01497 |              |
| <i>RBM20</i> | 10:112590831 | c.3464T>C          | p.Val1155Ala |                                 | DCM-UK-B8 |              |
| <i>RBM20</i> | 10:112590924 | c.3557A>G          | p.His1186Arg | ZF, C2H2-type                   | 10MG01841 |              |
| <i>LMNA</i>  | 1:156084868  | c.159A>C           | p.Glu53Asp   | Coil 1A                         | 20JT01288 |              |
| <i>LMNA</i>  | 1:156104287  | c.607G>A           | p.Glu203Lys  | Coil 1B                         | 12PH00095 | DCM (2)      |
| <i>LMNA</i>  | 1:156104594  | c.640-2A>G         |              | Coil 1B                         | 20BB01870 |              |
| <i>LMNA</i>  | 1:156104603  | c.647G>A           | p.Arg216His  | Coil 1B                         | LZ-III-4  |              |
| <i>LMNA</i>  | 1:156104617  | c.661C>T           | p.Arg221Cys  | Linker 2                        | 10LW02013 |              |
| <i>LMNA</i>  | 1:156104622  | c.667_668delGA     | p.Glu223fs   | Linker 2                        | 20PF01735 |              |
| <i>LMNA</i>  | 1:156104629  | c.673C>T           | p.Arg225*    | Linker 2                        | MIG111    | DCM ± CD (6) |
| <i>LMNA</i>  | 1:156108455  | c.1875C>A          | p.Ser625Arg  | Tail                            | 14SD01620 |              |
| <i>DES</i>   | 2:220283527  | c.343C>A           | p.Leu115Ile  | Coil 1A                         | DCM-UK-C1 |              |
| <i>DES</i>   | 2:220285304  | c.823A>G           | p.Arg275Gly  | Coil 2A                         | 14AM01556 | DCM (1)      |
| <i>DES</i>   | 2:220286231  | c.1193T>C          | p.Leu398Pro  | Coil 2B                         | FK-II-1   |              |
| <i>DES</i>   | 2:220286282  | c.1244G>A          | p.Arg415Gln  | Tail                            | 12JW00204 |              |
| <i>DES</i>   | 2:220290442  | c.1346A>C          | p.Lys449Thr  | Tail                            | FG-II-2   | MFM (1)      |
| <i>SCN5A</i> | 3:38622781   | c.2869A>G          | p.Asn957Asp  | Cytoplasmic                     | 20RJ01812 |              |
| <i>SCN5A</i> | 3:38616909   | c.3545A>G          | p.Asp1182Gly | Cytoplasmic                     | 20CP01865 |              |
| <i>SCN5A</i> | 3:38595793   | c.4790T>C          | p.Val1597Ala | Transmembrane, S3,<br>repeat IV | 14AM01556 |              |
| <i>SCN5A</i> | 3:38592729   | c.5134G>A          | p.Gly1712Ser | Extracellular                   | 20AB01158 | BS (1)       |
| <i>SCN5A</i> | 3:38591991   | c.872C>T           | p.Arg1958*   | Cytoplasmic, C-terminus         | C-II-9    | DCM (1)      |
| <i>BAG3</i>  | 10:121429543 | c.361C>T           | p.Arg121*    |                                 | BY-III-4  |              |
| <i>BAG3</i>  | 10:121429544 | c.362G>A           | p.Arg121Gln  |                                 | 20JO01157 |              |
| <i>BAG3</i>  | 10:121436309 | c.1243_1244insCT   | p.Pro416fs   | PXXP domain                     | 20PW01714 |              |
| <i>BAG3</i>  | 10:121436382 | c.1316T>A          | p.Val439Glu  | BAG domain                      | MBG-121   |              |
| <i>TPM1</i>  | 15:63351866  | c.479G>A           | p.Arg160His  | cTNT binding                    | DCM-21    |              |
| <i>TPM1</i>  | 15:63351878  | c.491A>G           | p.Glu164Gly  | cTNT binding                    | MDK-11    |              |
| <i>TPM1</i>  | 15:63354462  | c.688G>A           | p.Asp230Asn  |                                 | DCM-20    | DCM (3)      |
| <i>TPM1</i>  | 15:63356332  | c.842T>C           | p.Met281Thr  |                                 | SS200     | HCM (5)      |
| <i>TNNT2</i> | 1:201333470  | c.415C>T           | p.Arg139Cys  | α-TM b.s.                       | 10AB00132 | DCM (1)      |

|              |             |                 |             |                      |            |                   |
|--------------|-------------|-----------------|-------------|----------------------|------------|-------------------|
| <i>TNNT2</i> | 1:201333464 | c.421C>T        | p.Arg141Trp | $\alpha$ -TM b.s.    | MGY-123    | DCM (10), HCM (1) |
| <i>TNNT2</i> | 1:201331144 | c.586C>T        | p.Arg196Trp |                      | 10MP01703  |                   |
| <i>DSP</i>   | 6:7574464   | c.2276_2277insA | p.Thr760fs  | Globular, N-terminal | 10AS00411  | DCM (1)           |
| <i>DSP</i>   | 6:7575030   | c.2436+2T>C     |             | Globular, N-terminal | 20GF01948  |                   |
| <i>DSP</i>   | 6:7579556   | c.3133C>T       | p.Arg1045*  | Globular, N-terminal | 10KS01707  |                   |
| <i>PLN</i>   | 6:118880109 | c.25C>T         | p.Arg9Cys   | Cytoplasmic          | 20CP01865  | DCM (2)           |
| <i>PLN</i>   | 6:118880125 | c.41G>C         | p.Arg14Thr  | PKA motif            | DCM-UK-B11 |                   |
| <i>DMD</i>   | X: 32591954 | c.1612G>T       | p.Asp538Tyr | Spectrin 2 repeat    | 10RN00513  |                   |
| <i>LDB3</i>  | 10:88476516 | c.1664A>G       | p.Asn555Ser | LIM zinc-binding 1   | 10TM00933  |                   |

\* Damaging variants included truncating (trunc) or novel (ExAC) + deleterious (MetaSVM) missense variants in group A genes (*TTN* excluded).  $\alpha$ -TM,  $\alpha$ -tropomyosin; BS, Brugada syndrome; CD, conduction-system abnormalities; cTNT, cardiac troponin T; HCM, hypertrophic cardiomyopathy; LMM, light meromyosin region; MFM, myofibrillar myopathy; PKA, protein kinase A; ZF, zinc finger.

**Table S8.** Co-segregation analysis of rare (MAF < 0.1%) missense variants in the 41-gene dataset in 14 DCM families.

| Family | Gene         | Variant        | Gene group | MetaSVM     | MAF (ExAc)  | No. affected/<br>carriers* | LOD score# |
|--------|--------------|----------------|------------|-------------|-------------|----------------------------|------------|
| AB     | <i>RBM20</i> | p.Arg634Trp    | A          | Deleterious | Absent      | 6/6                        | 1.46       |
|        | <i>TTN</i>   | p.Ala21147Thr  | A          | Deleterious | 0.0007573   | 2/3                        | -3.82      |
| BG     | <i>MYH7</i>  | p.Glu1610Gln   | A          | Deleterious | Absent      | 6/9                        | -1.47      |
|        | <i>TTN</i>   | p.Met1001Arg   | A          | Tolerated   | 0.0001072   | 6/6                        | -3.41      |
| BK     | <i>MYH7</i>  | p.Ile736Thr    | A          | Deleterious | Absent      | 2/3                        | -0.19      |
| CZ     | <i>MYH7</i>  | p.Arg369Gln    | A          | Deleterious | Absent      | 4/4                        | 1.11       |
|        | <i>TTN</i>   | p.Arg18037Trp  | A          | Tolerated   | 0.00004172  | 2/3                        | 0.12       |
|        | <i>TTN</i>   | p.Val205641Ile | A          | Tolerated   | 0.000008327 | 4/5                        | -0.18      |
| DO     | <i>TTN</i>   | p.Cys31725Arg  | A          | Deleterious | Absent      | 2/6                        | 0.28       |
| FG     | <i>DES</i>   | p.Lys449Thr    | A          | Deleterious | Absent      | 4/4                        | 1.33       |
|        | <i>SYNM</i>  | p.Ser1089Leu   | D          | Tolerated   | 0.0003569   | 1/4                        | -0.39      |
| FK     | <i>DES</i>   | p.Leu398Pro    | A          | Deleterious | Absent      | 4/4                        | 1.38       |
|        | <i>ACTN2</i> | p.Arg398Cys    | C          | Tolerated   | 0.00003295  | 1/2                        | 0.68       |
|        | <i>LDB3</i>  | p.Pro472Thr    | A          | Tolerated   | Absent      | 3/5                        | -3.47      |
|        | <i>SYNE1</i> | p.Asn4590Asp   | C          | Tolerated   | 0.00009071  | 2/3                        | -2.94      |
| FR     | <i>TTN</i>   | p.Arg34092His  | A          | Tolerated   | 0.00004973  | 1/3                        | 0.6        |
|        | <i>RBM20</i> | p.Leu908Pro    | A          | Deleterious | Absent      | 3/6                        | 0.40       |
|        | <i>LAMA2</i> | p.Arg998His    | D          | Tolerated   | 0.0001426   | 1/3                        | 0.58       |
|        | <i>TTN</i>   | p.Thr28241Ile  | A          | Tolerated   | 0.00008418  | 2/4                        | -1.11      |
| GE     | <i>DSP</i>   | p.Gly2245Ala   | A          | Tolerated   | 0.000008364 | 1/1                        | -0.17      |
|        | <i>TTN</i>   | p.Asn31858Ser  | A          | Tolerated   | 0.00003312  | 1/1                        | -0.17      |
| GI     | <i>TTN</i>   | p.Lys28162Thr  | A          | Tolerated   | Absent      | 3/4                        | -0.08      |
| GX     | <i>DMD</i>   | p.Glu2976Lys   | A          | Tolerated   | 0.00002711  | 2/3                        | 0          |
|        | <i>RBM20</i> | p.Pro706Thr    | A          | Tolerated   | Absent      | 1/2                        | 0          |
|        | <i>SYNE1</i> | p.Arg5832His   | C          | Tolerated   | 0.00001647  | 2/3                        | 0          |
|        | <i>TTN</i>   | p.Glu29772Lys  | A          | Tolerated   | 0.0002655   | 2/2                        | 0          |
| ID     | <i>SYNE1</i> | p.Gln1185Lys   | C          | Tolerated   | 0.00002471  | 2/5                        | 0.17       |

|    |              |               |   |             |           |     |           |
|----|--------------|---------------|---|-------------|-----------|-----|-----------|
| KS | <i>RBM20</i> | p.Arg636Cys   | A | Deleterious | Absent    | 3/5 | -1.11     |
|    | <i>TTN</i>   | p.Gln28506Lys | A | Tolerated   | 0.0003342 | 2/2 | $-\infty$ |
| Y  | <i>NEB</i>   | p.Asp1329Ala  | D | Deleterious | 0.0008056 | 3/6 | -2.64     |

\* Includes all affected individuals and unaffected individuals aged >40 years.

# LOD scores for each variant (theta = 0, penetrance 0.7) were based on all genotyped family members; pedigrees are shown in Figure 2 and Supplementary Figure 2.

**Table S9.** Distribution of rare variants in DCM cases and controls\* across different protein functional domains.

| Protein domain                             | Protein location<br>(aa) | No. variants |          | Odd ratio | Confidence<br>interval | P value         |
|--------------------------------------------|--------------------------|--------------|----------|-----------|------------------------|-----------------|
|                                            |                          | DCM cases    | Controls |           |                        |                 |
| <i>MYH7</i> ( $\beta$ -myosin heavy chain) |                          |              |          |           |                        |                 |
| Myosin motor                               | 85 - 778                 | 42           | 108      | 3.35      | 2.24 - $\infty$        | <b>2.35E-07</b> |
| Neck (IQ)                                  | 781 - 810                | 2            | 15       | 0.81      | 0.13 - $\infty$        | 0.72            |
| Tail - Rod/hinge                           | 838 - 1126               | 15           | 130      | 0.65      | 0.37 - $\infty$        | 0.95            |
| Tail - Hinge                               | 1127 - 1279              | 5            | 12       | 2.61      | 0.87- $\infty$         | 0.08            |
| Tail - Light meromyosin (LMM)              | 1279 - 1935              | 30           | 303      | 0.43      | 0.29 - $\infty$        | 1.00            |
| All domains                                | 1-1935                   | 100          | 609      | NA        | NA                     | NA              |
| <i>RBM20</i> (RNA-binding protein 20)      |                          |              |          |           |                        |                 |
| Proline-rich                               | 13 - 86                  | 0            | 1        | 0         | 0 - $\infty$           | 1.00            |
| Zinc finger                                | 412 - 436                | 0            | 0        | 0         | 0 - $\infty$           | 1.00            |
| RNA-recognition motif (RRM)                | 518 - 593                | 2            | 4        | 0.94      | 0.12 - $\infty$        | 0.68            |
| Arg-Ser-rich (RS)                          | 628 - 655                | 9            | 4        | 5.05      | 1.56 - $\infty$        | <b>0.008</b>    |
| Glutamate-rich                             | 843 - 931                | 6            | 6        | 2.02      | 0.61 - $\infty$        | 0.20            |
| Zinc finger                                | 1159 - 1193              | 1            | 1        | 1.89      | 0.05 - $\infty$        | 0.58            |
| All domains                                | 1 - 1227                 | 41           | 77       | NA        | NA                     | NA              |
| <i>LMNA</i> (lamin A/C)                    |                          |              |          |           |                        |                 |
| Head                                       | 1 - 33                   | 0            | 24       | 0         | 0 - $\infty$           | 1.00            |
| Rod - coil 1A                              | 34 - 70                  | 4            | 0        | $\infty$  | 4.12 - $\infty$        | <b>0.001</b>    |
| Rod - linker 1                             | 71 - 80                  | 0            | 2        | 0         | 0 - $\infty$           | 1.00            |
| Rod - coil 1B                              | 81 - 218                 | 9            | 22       | 1.98      | 0.86 - $\infty$        | 0.09            |
| Rod- linker 2                              | 219 - 242                | 6            | 10       | 2.86      | 0.98 - $\infty$        | <b>0.05</b>     |
| Rod - coil 2                               | 243 - 383                | 20           | 40       | 3.04      | 1.64 - $\infty$        | <b>0.001</b>    |
| Tail                                       | 384 - 646                | 9            | 113      | 0.20      | 0.09 - $\infty$        | 1.00            |
| All domains                                | 1 - 646                  | 48           | 211      | NA        | NA                     | NA              |
| <i>DES</i> (desmin)                        |                          |              |          |           |                        |                 |



|                                                 |           |    |     |          |                  |                 |
|-------------------------------------------------|-----------|----|-----|----------|------------------|-----------------|
| Head                                            | 1 - 108   | 3  | 30  | 1.28     | 0.29 - $\infty$  | 0.47            |
| Rod - coil 1A                                   | 109 - 141 | 1  | 11  | 1.12     | 0.05 - $\infty$  | 0.62            |
| Rod - linker 1                                  | 142 - 151 | 1  | 0   | $\infty$ | 0.64 - $\infty$  | 0.08            |
| Rod - coil 1B                                   | 152 - 252 | 0  | 61  | 0        | 0 - $\infty$     | 1.00            |
| Rod - linker 12                                 | 253 - 268 | 0  | 0   | 0        | 0 - $\infty$     | 1.00            |
| Rod - coil 2A                                   | 269 - 287 | 2  | 2   | 13.44    | 1.37 - $\infty$  | <b>0.03</b>     |
| Rod - linker 2                                  | 288 - 295 | 0  | 1   | 0        | 0 - $\infty$     | 1               |
| Rod - coil 2B                                   | 296 - 412 | 5  | 57  | 1.11     | 0.36 - $\infty$  | 0.53            |
| Tail                                            | 413 - 470 | 4  | 34  | 1.58     | 0.45 - $\infty$  | 0.32            |
| All domains                                     | 1 - 470   | 16 | 196 | NA       | NA               | NA              |
| <i>SCN5A</i> (cardiac sodium channel protein 5) |           |    |     |          |                  |                 |
| Cytoplasmic, N-terminus                         | 1 - 126   | 0  | 60  | 0        | 0 - $\infty$     | 1.00            |
| Repeat I                                        | 127 - 415 | 6  | 110 | 1.78     | 0.70 - $\infty$  | 0.16            |
| S1, repeat I                                    | 127 - 150 | 0  | 1   | 0        | 0 - $\infty$     | 1.00            |
| Extracellular                                   | 151 - 158 | 0  | 1   | 0        | 0 - $\infty$     | 1.00            |
| S2, repeat I                                    | 159 - 178 | 0  | 25  | 0        | 0 - $\infty$     | 1.00            |
| Cytoplasmic                                     | 179 - 191 | 0  | 28  | 0        | 0 - $\infty$     | 1.00            |
| S3, repeat I                                    | 192 - 210 | 0  | 1   | 0        | 0 - $\infty$     | 1.00            |
| Extracellular                                   | 211 - 216 | 0  | 17  | 0        | 0 - $\infty$     | 1.00            |
| S4, repeat I, voltage sensor                    | 217 - 236 | 6  | 5   | 43.35    | 12.64 - $\infty$ | <b>2.89E-07</b> |
| Cytoplasmic                                     | 237 - 252 | 0  | 3   | 0        | 0 - $\infty$     | 1.00            |
| S5, repeat I                                    | 253 - 276 | 0  | 1   | 0        | 0 - $\infty$     | 1.00            |
| Extracellular                                   | 277 - 389 | 0  | 28  | 0        | 0 - $\infty$     | 1.00            |
| S6, repeat I                                    | 390 - 415 | 0  | 0   | 0        | 0 - $\infty$     | 1.00            |
| Cytoplasmic                                     | 416 - 711 | 6  | 213 | 0.80     | 0.32 - $\infty$  | 0.75            |
| Repeat II                                       | 712 - 939 | 1  | 36  | 0.82     | 0.04 - $\infty$  | 0.71            |
| S1, repeat II                                   | 712 - 736 | 0  | 2   | 0        | 0 - $\infty$     | 1.00            |
| Extracellular                                   | 737 - 747 | 0  | 2   | 0        | 0 - $\infty$     | 1.00            |
| S2, repeat II                                   | 748 - 771 | 0  | 4   | 0        | 0 - $\infty$     | 1.00            |
| Cytoplasmic                                     | 772 - 779 | 0  | 1   | 0        | 0 - $\infty$     | 1.00            |
| S3, repeat II                                   | 780 - 799 | 0  | 9   | 0        | 0 - $\infty$     | 1.00            |
| Extracellular                                   | 800 - 805 | 0  | 5   | 0        | 0 - $\infty$     | 1.00            |

|                                |             |    |     |       |                 |              |
|--------------------------------|-------------|----|-----|-------|-----------------|--------------|
| S4, repeat II, voltage sensor  | 806 - 825   | 1  | 3   | 10.18 | 0.38 - $\infty$ | 0.12         |
| Cytoplasmic                    | 826 - 841   | 0  | 4   | 0     | 0 - $\infty$    | 1.00         |
| S5, repeat II                  | 842 - 862   | 0  | 0   | 0     | 0 - $\infty$    | 1.00         |
| Extracellular                  | 863 - 913   | 0  | 5   | 0     | 0 - $\infty$    | 1.00         |
| S6, repeat II                  | 914 - 939   | 0  | 1   | 0     | 0 - $\infty$    | 1.00         |
| Cytoplasmic                    | 940 - 1200  | 9  | 137 | 2.35  | 1.08 - $\infty$ | <b>0.035</b> |
| Repeat III                     | 1201 - 1470 | 2  | 148 | 0.36  | 0.06 - $\infty$ | 0.97         |
| S1, repeat III                 | 1201 - 1224 | 0  | 4   | 0     | 0 - $\infty$    | 1.00         |
| Extracellular                  | 1225 - 1237 | 0  | 0   | 0     | 0 - $\infty$    | 1.00         |
| S2, repeat III                 | 1238 - 1263 | 0  | 31  | 0     | 0 - $\infty$    | 1.00         |
| Cytoplasmic                    | 1264 - 1269 | 0  | 1   | 0     | 0 - $\infty$    | 1.00         |
| S3, repeat III                 | 1270 - 1291 | 0  | 18  | 0     | 0 - $\infty$    | 1.00         |
| Extracellular                  | 1292 - 1295 | 0  | 43  | 0     | 0 - $\infty$    | 1.00         |
| S4, repeat III, voltage sensor | 1296 - 1317 | 0  | 25  | 0     | 0 - $\infty$    | 1.00         |
| Cytoplasmic                    | 1318 - 1336 | 0  | 3   | 0     | 0 - $\infty$    | 1.00         |
| S5, repeat III                 | 1337 - 1359 | 1  | 11  | 2.77  | 0.13 - $\infty$ | 0.33         |
| Extracellular                  | 1360 - 1443 | 1  | 9   | 3.39  | 0.15 - $\infty$ | 0.28         |
| S6, repeat III                 | 1444 - 1470 | 0  | 3   | 0     | 0 - $\infty$    | 1.00         |
| Cytoplasmic                    | 1471 - 1523 | 0  | 17  | 0     | 0 - $\infty$    | 1.00         |
| Repeat IV                      | 1524 - 1772 | 2  | 55  | 1.09  | 0.18 - $\infty$ | 0.56         |
| S1, repeat IV                  | 1524 - 1547 | 0  | 3   | 0     | 0 - $\infty$    | 1.00         |
| Extracellular                  | 1548 - 1558 | 0  | 1   | 0     | 0 - $\infty$    | 1.00         |
| S2, repeat IV                  | 1559 - 1582 | 0  | 3   | 0     | 0 - $\infty$    | 1.00         |
| Cytoplasmic                    | 1583 - 1588 | 0  | 1   | 0     | 0 - $\infty$    | 1.00         |
| S3, repeat IV                  | 1589 - 1612 | 1  | 16  | 1.89  | 0.09 - $\infty$ | 0.43         |
| Extracellular                  | 1613 - 1622 | 0  | 1   | 0     | 0 - $\infty$    | 1.00         |
| S4, repeat IV, voltage sensor  | 1623 - 1644 | 0  | 10  | 0     | 0 - $\infty$    | 1.00         |
| Cytoplasmic                    | 1645 - 1659 | 0  | 2   | 0     | 0 - $\infty$    | 1.00         |
| S5, repeat IV                  | 1660 - 1682 | 0  | 9   | 0     | 0 - $\infty$    | 1.00         |
| Extracellular                  | 1683 - 1747 | 1  | 7   | 4.36  | 0.19 - $\infty$ | 0.23         |
| S6, repeat IV                  | 1748 - 1772 | 0  | 2   | 0     | 0 - $\infty$    | 1.00         |
| Cytoplasmic                    | 1773 - 2017 | 5  | 150 | 0.99  | 0.36 - $\infty$ | 0.58         |
| All domains                    | 1 - 2017    | 31 | 926 | NA    | NA              | NA           |

|                                             |             |    |      |       |                 |                 |
|---------------------------------------------|-------------|----|------|-------|-----------------|-----------------|
| <i>BAG3</i> (BAG3)                          |             |    |      |       |                 |                 |
| WW1                                         | 20 - 54     | 0  | 9    | 0     | 0 - $\infty$    | 1.00            |
| IPV                                         | 87 - 101    | 0  | 3    | 0     | 0 - $\infty$    | 1.00            |
| WW2                                         | 124 - 154   | 0  | 15   | 0     | 0 - $\infty$    | 1.00            |
| IPV                                         | 200 - 213   | 1  | 5    | 14.57 | 0.54 - $\infty$ | 0.09            |
| PXXP                                        | 302 - 417   | 2  | 80   | 1.87  | 0.25 - $\infty$ | 0.38            |
| BAG                                         | 421 - 498   | 1  | 14   | 5.17  | 0.21 - $\infty$ | 0.21            |
| All domains                                 | 1 - 575     | 6  | 379  | NA    | NA              | NA              |
| <i>TPM1</i> ( $\alpha$ -tropomyosin)        |             |    |      |       |                 |                 |
| Cardiac troponin T binding                  | 150 - 180   | 2  | 1    | 5.42  | 0.41 - $\infty$ | 0.19            |
| All domains                                 | 1 - 284     | 24 | 62   | NA    | NA              | NA              |
| <i>TNNT2</i> (cardiac troponin T)           |             |    |      |       |                 |                 |
| $\alpha$ -tropomyosin binding               | 78 - 171    | 15 | 33   | 8.96  | 3.76 - $\infty$ | <b>2.85E-06</b> |
| Troponin C/I/ $\alpha$ -tropomyosin binding | 198 - 289   | 4  | 93   | 0.23  | 0.07 - $\infty$ | 1.00            |
| All domains                                 | 2 - 298     | 23 | 193  | NA    | NA              | NA              |
| <i>DSP</i> (desmoplakin)                    |             |    |      |       |                 |                 |
| Globular 1                                  | 1 - 1056    | 20 | 536  | 1.05  | 0.62 - $\infty$ | 0.48            |
| Plakophilin/plakoglobin binding             | 1 - 584     | 15 | 269  | 1.78  | 0.99 - $\infty$ | <b>0.05</b>     |
| Rod                                         | 1057 - 1945 | 18 | 503  | 0.99  | 0.57 - $\infty$ | 0.57            |
| All Globular 2                              | 1946 - 2871 | 12 | 345  | 0.95  | 0.50 - $\infty$ | 0.61            |
| Globular 2 - domain A                       | 1960 - 2208 | 0  | 96   | 0     | 0 - $\infty$    | 1.00            |
| Globular 2 - domain B                       | 2244 - 2446 | 3  | 89   | 0.93  | 0.24 - $\infty$ | 0.63            |
| Globular 2 - domain C                       | 2609 - 2822 | 3  | 73   | 1.15  | 0.30 - $\infty$ | 0.50            |
| Globular 2 - SR                             | 2824 - 2847 | 2  | 14   | 4.07  | 0.64 - $\infty$ | 0.10            |
| All domains                                 | 1 - 2871    | 50 | 1384 | NA    | NA              | NA              |
| <i>PLN</i> (phospholamban)                  |             |    |      |       |                 |                 |
| Cytoplasmic                                 | 1 - 31      | 4  | 6    | 0     | 0 - $\infty$    | 1.00            |

|                         |             |   |    |       |                 |                 |
|-------------------------|-------------|---|----|-------|-----------------|-----------------|
| HAX binding             | 16 - 22     | 1 | 3  | 0.37  | 0.01 - $\infty$ | 0.93            |
| Helical                 | 32 - 52     | 0 | 0  | 0     | 0 - $\infty$    | 1.00            |
| All domains             | 1 - 52      | 4 | 6  | NA    | NA              | NA              |
| <i>DMD (dystrophin)</i> |             |   |    |       |                 |                 |
| Actin binding - CH1     | 15 - 119    | 1 | 16 | 2.53  | 0.12 - $\infty$ | 0.35            |
| Actin binding - CH2     | 134 - 237   | 1 | 41 | 0.97  | 0.05 - $\infty$ | 0.65            |
| Spectrin 1              | 339 - 447   | 2 | 88 | 0.90  | 0.15 - $\infty$ | 0.66            |
| Spectrin 2              | 448 - 556   | 6 | 23 | 12.82 | 4.69 - $\infty$ | <b>4.04E-05</b> |
| Spectrin 3              | 559 - 667   | 1 | 58 | 0.67  | 0.03 - $\infty$ | 0.78            |
| Spectrin 4              | 719 - 828   | 2 | 47 | 1.74  | 0.29 - $\infty$ | 0.34            |
| Spectrin 5              | 830 - 934   | 0 | 36 | 0     | 0 - $\infty$    | 1.00            |
| Spectrin 6              | 943 - 1045  | 1 | 45 | 0.88  | 0.04 - $\infty$ | 0.69            |
| Spectrin 7              | 1048 - 1154 | 2 | 38 | 2.17  | 0.36 - $\infty$ | 0.26            |
| Spectrin 8              | 1157 - 1263 | 1 | 9  | 4.53  | 0.20 - $\infty$ | 0.22            |
| Spectrin 9              | 1266 - 1367 | 3 | 42 | 3.05  | 0.75 - $\infty$ | 0.09            |
| Spectrin 10             | 1368 - 1463 | 1 | 39 | 1.02  | 0.05 - $\infty$ | 0.64            |
| Spectrin 11             | 1468 - 1568 | 2 | 18 | 4.66  | 0.74 - $\infty$ | 0.08            |
| Spectrin 12             | 1571 - 1676 | 1 | 60 | 0.65  | 0.03 - $\infty$ | 0.79            |
| Spectrin 13             | 1679 - 1778 | 0 | 21 | 0     | 0 - $\infty$    | 1.00            |
| Spectrin 14             | 1779 - 1874 | 0 | 37 | 0     | 0 - $\infty$    | 1.00            |
| Spectrin 15             | 1877 - 1979 | 0 | 48 | 0     | 0 - $\infty$    | 1.00            |
| Spectrin 16             | 1992 - 2101 | 0 | 34 | 0     | 0 - $\infty$    | 1.00            |
| Spectrin 17             | 2104 - 2208 | 1 | 61 | 0.64  | 0.03 - $\infty$ | 0.80            |
| Spectrin 18             | 2211 - 2318 | 0 | 17 | 0     | 0 - $\infty$    | 1.00            |
| Spectrin 19             | 2319 - 2423 | 0 | 29 | 0     | 0 - $\infty$    | 1.00            |
| Spectrin 20             | 2475 - 2577 | 0 | 20 | 0     | 0 - $\infty$    | 1.00            |
| Spectrin 21             | 2580 - 2686 | 0 | 27 | 0     | 0 - $\infty$    | 1.00            |
| Spectrin 22             | 2689 - 2802 | 0 | 36 | 0     | 0 - $\infty$    | 1.00            |
| Spectrin 23             | 2808 - 2930 | 0 | 16 | 0     | 0 - $\infty$    | 1.00            |
| Spectrin 24             | 2935 - 3040 | 1 | 46 | 0.86  | 0.04 - $\infty$ | 0.70            |
| WW                      | 3055 - 3088 | 0 | 1  | 0     | 0 - $\infty$    | 1.00            |
| Zinc finger             | 3307 - 3354 | 0 | 1  | 0     | 0 - $\infty$    | 1.00            |

|                                             |          |    |      |      |                 |      |
|---------------------------------------------|----------|----|------|------|-----------------|------|
| All domains                                 | 1 - 3685 | 28 | 1112 | NA   | NA              | NA   |
| <i>LDB3</i> (LIM domain-binding protein 3 ) |          |    |      |      |                 |      |
| PDZ                                         | 1-85     | 0  | 63   | 0    | 0 - $\infty$    | 1    |
| LIM zinc-binding 1                          | 549-607  | 2  | 40   | 2.57 | 0.41 - $\infty$ | 0.21 |
| LIM zinc-binding 2                          | 608-667  | 3  | 59   | 2.71 | 0.66 - $\infty$ | 0.13 |
| LIM zinc-binding 3                          | 668-727  | 1  | 48   | 1.00 | 0.05 - $\infty$ | 0.64 |
| All domains                                 | 1 - 727  | 19 | 914  | NA   | NA              | NA   |

\* DCM cases include this study (n=532), familial DCM replication cohort (n=101) and patients evaluated in two clinical diagnostic laboratories (reported by Walsh et al.<sup>1</sup>), population control variants were derived from the ExAC database.

## **Supplemental Acknowledgments**

We thank the Medical Genome Reference Bank (MGRB) for providing healthy elderly control sequencing data. The MGRB is comprised of whole-genome sequencing data and phenotypic information from up to 4000 healthy Australians over 70 years of age. MGRB participants, consented through contributing studies, 45 and UP (Sax Institute, Sydney) and the ASPirin in Reducing Events in the Elderly (ASPREE) clinical trial (Monash University, Melbourne) are free from cardiovascular disease, degenerative neurological disorders and of a history of cancer at the time of consent into the study.

### **ASPREE Acknowledgements**

Authors would like to acknowledge the ASPREE Healthy Ageing Biobank, ASPREE Investigator Group and ASPREE Collaborating Practitioners listed on [www.aspree.org](http://www.aspree.org), as well as ASPREE representatives John McNeil, Robyn Woods and Paul Lacaze for their contributions to the MGRB project. ASPREE was funded by the National Institute on Aging and the National Cancer Institute at the National Institutes of Health (grant number U01AG029824); the National Health and Medical Research Council of Australia (grant numbers 334047, 1127060); Monash University (Australia). The ASPREE Healthy Ageing Biobank was supported by the Commonwealth Scientific and Industrial Research Organisation (Australia), the Victorian Cancer Agency (Australia) and Monash University (Australia). Authors acknowledge the dedicated and skilled staff in Australia and the U.S. for the conduct of the ASPREE trial, and the ASPREE participants who willingly volunteered.

### **45 and Up Acknowledgements**

This research was completed using data collected through the 45 and Up Study ([www.saxinstitute.org.au](http://www.saxinstitute.org.au)). The 45 and Up Study is managed by the Sax Institute in

collaboration with major partner Cancer Council NSW; and partners: the National Heart Foundation of Australia (NSW Division); NSW Ministry of Health; NSW Government Family & Community Services – Ageing, Carers and the Disability Council NSW; and the Australian Red Cross Blood Service. We thank the many thousands of people participating in the 45 and Up Study.

### Supplemental References

1. Walsh R, Thomson KL, Ware JS, et al. Reassessment of Mendelian gene pathogenicity using 7,855 cardiomyopathy cases and 60,706 reference samples. *Genet Med* 2017;19:192-203.
2. Herman DS, Lam L, Taylor MR, et al. Truncations of titin causing dilated cardiomyopathy. *N Engl J Med* 2012;366:619-628.
3. Roberts AM, Ware JS, Herman DS, et al. Integrated allelic, transcriptional, and phenomic dissection of the cardiac effects of titin truncations in health and disease. *Sci Transl Med* 2015;7:270ra6.
4. Fatkin D, Lam L, Herman DS, et al. Titin truncating mutations: a rare cause of dilated cardiomyopathy in the young. *Prog Ped Cardiol* 2016;40:41-45.
5. Ceyhan-Birsoy O, Agrawal PB, Hidalgo C, et al. Recessive truncating titin gene, *TTN*, mutations presenting as centronuclear myopathy. *Neurology* 2013;81:1205-1214.
